# Supplementary material for: Climate Change Effects on Fish Passability across a Rock Weir in a Mediterranean River
Source: MDPI journal article supplement (doi:10.3390/w13192758), 2021-10-05
Supplement: s1 [file s1]

## Supplementary Material

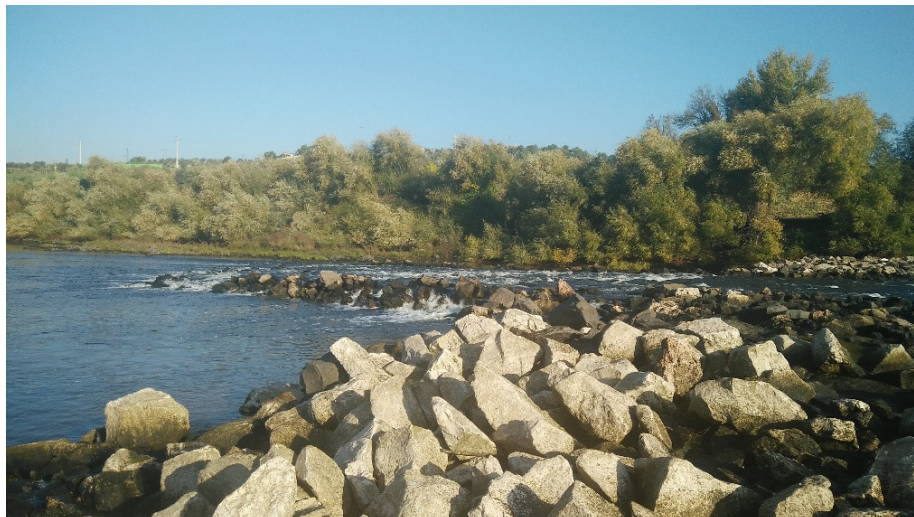

**Figure S1.** Fish ramp (20 m long, 4 m wide, 23 m elevation, 2.5% longitudinal slope), at the right margin of the Tagus River, incorporated in the Pego weir. Picture retrieved following the study by Ferreira et al. [41].

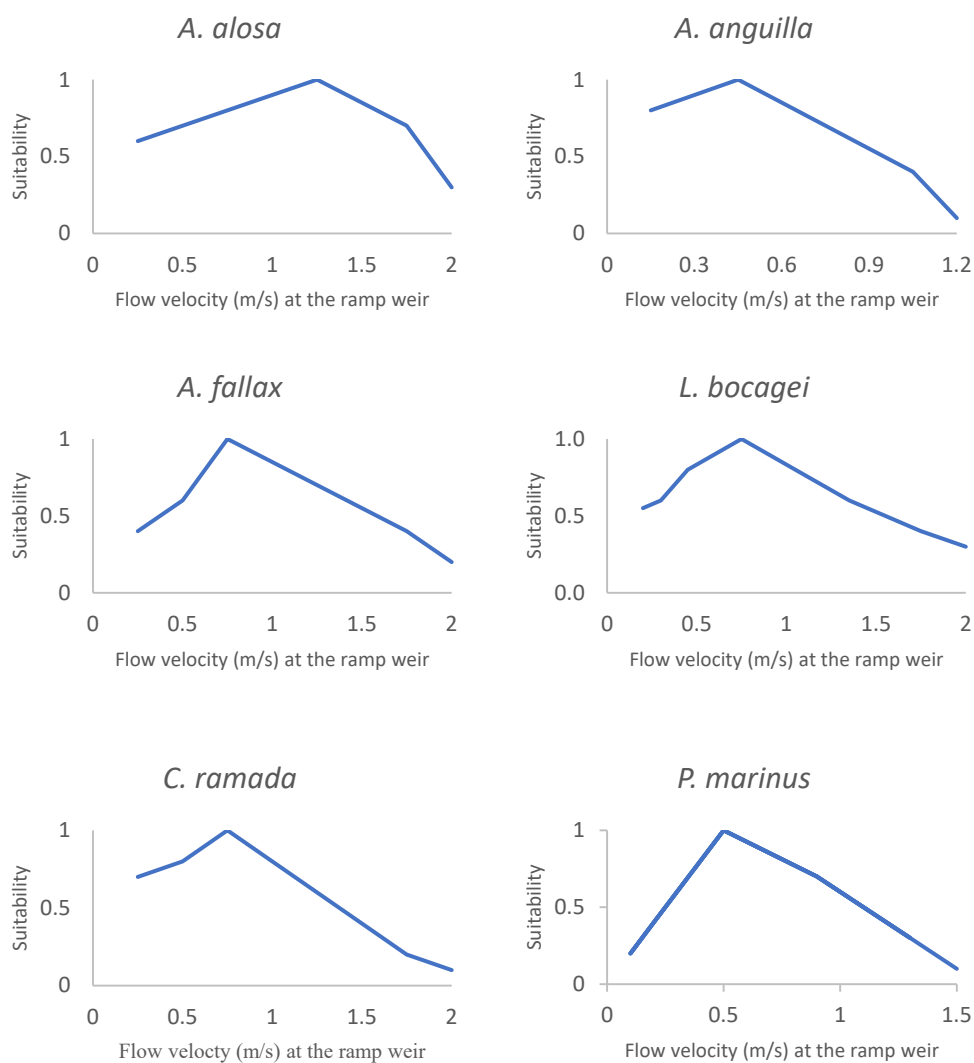

**Figure S2.** Suitability curves for the flow velocity at the ramp weir for each species, based on expert judgment following a literature review (see Table 1).

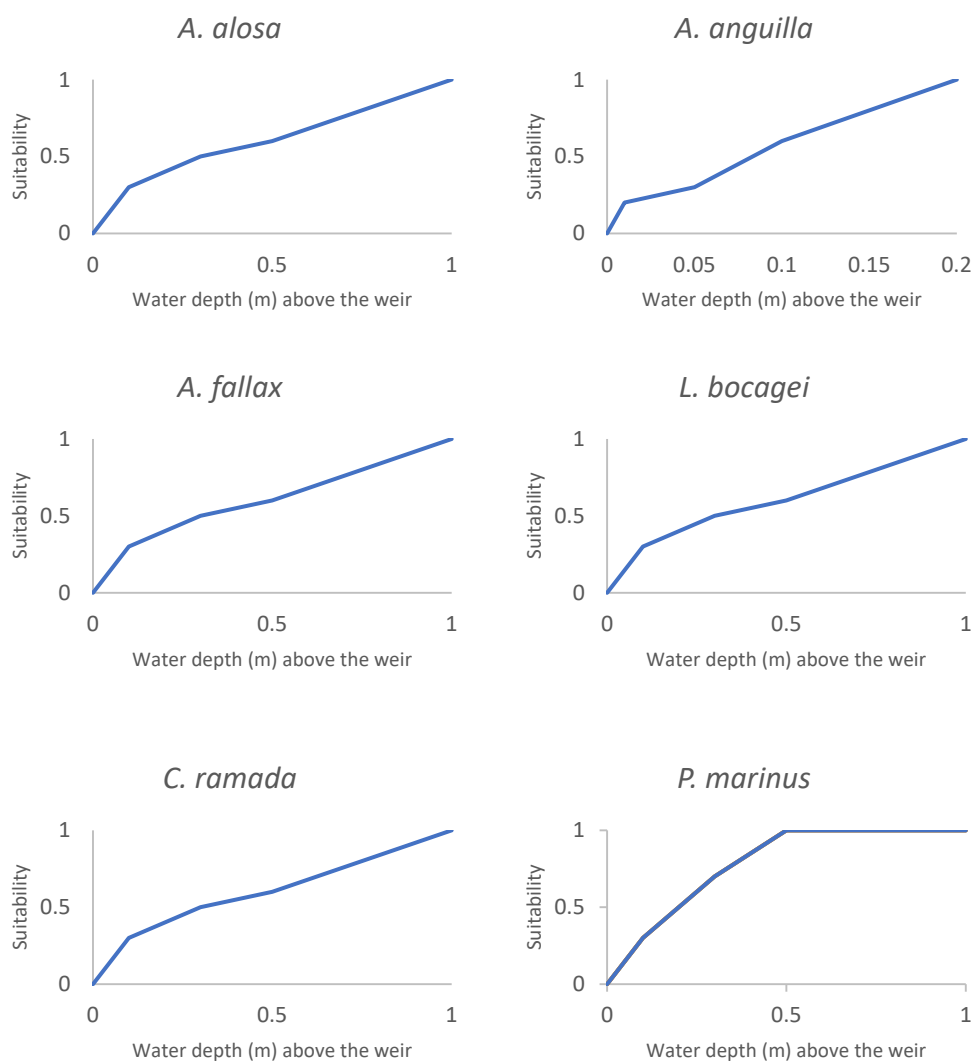

**Figure S3.** Suitability curves for the water depth above the weir for each species, based on expert judgment following a literature review (see Table 1).
